# 1 Australian native flower colours: does nectar 2 reward drive bee pollinator flower preferences?

3

4

5 Mani Shrestha<sup>1</sup>, Jair E Garcia<sup>1</sup>, Martin Burd<sup>2</sup>, Adrian G Dyer<sup>1\*</sup>

6

7

8 <sup>1</sup> Bio-Inspired Digital Lab (BIDS-Lab), Schools of Media and Communication, RMIT

9 University, Melbourne 3001, Australia

10

11 <sup>2</sup> School of Biological Sciences, Monash University, Clayton 3800, Australia, Australia

12

13

14

15 \*Author for correspondence: [adrian.dyer@rmit.edu.au](mailto:adrian.dyer@rmit.edu.au)

16

17

18

19 **Short title:** Flower colour, nectar and bee preference

20 **Keywords:** Pollination; Innate: Preference; Flower community; Rewards

21

## 22 **Abstract**

23

24           Colour is an important signal that flowering plants use to attract insect pollinators  
 25 like bees. Previous research in Germany has shown that nectar volume is higher for flower  
 26 colours that are innately preferred by European bees, suggesting an important link between  
 27 colour signals, bee preferences and floral rewards. In Australia, flower colour signals have  
 28 evolved in parallel to the Northern hemisphere to enable easy discrimination and detection  
 29 by the phylogenetically ancient trichromatic visual system of bees, and native Australian  
 30 bees also possess similar innate colour preferences to European bees. We measured 59  
 31 spectral signatures from flowers present at two preserved native habitats in South Eastern  
 32 Australia and tested whether there were any significant differences in the frequency of  
 33 flowers presenting higher nectar rewards depending upon the colour category of the flower  
 34 signals, as perceived by bees. We also tested if there was a significant correlation between  
 35 chromatic contrast and the frequency of flowers presenting higher nectar rewards. For the  
 36 entire sample, and for subsets excluding species in the Asteraceae and Orchidaceae, we  
 37 found no significant difference among colour categories in the frequency of high nectar  
 38 reward. This suggests that whilst such relationships between flower colour signals and  
 39 nectar volume rewards have been observed at a field site in Germany, the effect is likely to  
 40 be specific at a community level rather than a broad general principle that has resulted in  
 41 the common signalling of bee flower colours around the world.

42

43

44

45

46

## 47 **Introduction**

48

49       Many floral traits play a role in the reproduction of animal-pollinated angiosperms  
50 [1–5]. Colour is one of the most important signals used by flowering plants to  
51 communicate to their pollinators [6–10]. Flowers typically present nutritional rewards like  
52 nectar to entice floral visitors [6,11–15], and nectar is a reward that can promote learning  
53 and neural changes in a bees visual system [16]. What relationship between floral colour  
54 signals and nectar as a reward that promotes motivation in insect pollinators, should evolve  
55 in plants? Whilst nectar has been well studied in flowering plants [15,17–20], the question  
56 of a potential relationship has been rarely considered because many animals have very  
57 different colour vision to humans [21]. Thus, colour is not an unambiguous trait, and to test  
58 colour as a factor in a biologically meaningful way it is necessary to map how relevant  
59 pollinators like bees perceive and use colour information.

60       Both male and female fitness of plants should often benefit from pollinator visits,  
61 especially given widespread pollen-limitation of seed set [22]. Such fitness benefits for  
62 plants will be especially strong with flower visitors like bees that tend to be ‘flower  
63 constant,’ that is, to use colour signals to repeatedly visit flowers of the same plant species  
64 [23]. In turn, the ability of pollinators to assess which floral colour signals are more  
65 reliable predictors of nutritional rewards will affect the foraging success of individuals [24]  
66 and thus the subsequent success of bee colonies [14,25–27]. This leads to an interesting  
67 hypothesis that bees may have evolved colour preferences because visiting flowers with  
68 higher rewards improves foraging performance while flowers gain increased pollination  
69 services by signaling higher rewards in a reciprocal selection loop that promotes the  
70 evolution of certain flower colours [28].

71           Colour vision requires multiple photoreceptors with different sensitivities (Jacobs  
72   2018). The spectral sensitivities of photoreceptors in many bee species have been  
73   empirically determined, showing that the trichromatic colour vision of bees is highly  
74   conserved and predates the evolution of flowers [29]. To yield colour information,  
75   photoreceptor signals have to be antagonistically processed in a brain [21]. Such colour  
76   opponent mechanisms in bees have been empirically recorded [30–32]. Knowing this  
77   information enables the construction of a colour space that accurately represents colour  
78   information, and the colour Hexagon is an opponent colour space that represents the visual  
79   capabilities of trichromatic bees [33]. In the current manuscript we use capitals (e.g.  
80   BLUE) to convey a region in bee colour space (e.g. see Fig. 1a), and ‘blue’ to refer to how  
81   humans typically describe colour stimuli, following the convention proposed by [34]).

82           Interestingly, both honeybees and bumblebees show similar distinct preferences for  
83   short wavelength ‘blue’ stimuli that frequently have loci in the UV-BLUE, BLUE and/or  
84   BLUE-GREEN sectors of bee colour space [28,35–40]. It has also been recently shown  
85   that native bees in Australia show a significant colour preference for stimuli in the BLUE  
86   and BLUE-GREEN regions of bee colour space [41,42]. These potentially common bee  
87   colour preferences provide a plausible explanation for why bee pollinated flowers around  
88   the world frequently share similar distributions in colour space [43].

89           Floral colour distributions in natural plant communities have recently been  
90   documented from a geographically wide array of sites [3,44–52] including several recent  
91   studies that use sophisticated modeling of pollinator colour vision [43,52–54]. Where bees  
92   are present in both the Northern [3,46,55] and Southern [56–58] Hemispheres, flowers tend  
93   to have evolved colour signals that are efficiently processed by bee trichromatic vision. In  
94   Australia it has been observed at both a continental level [56,58] and a local community  
95   level [43,54] that flower colours share a very similar distribution in colour space to flower

96 colour distributions in the Northern Hemisphere where bees with a blue preference are the  
97 dominant pollinator. Evolutionary change in floral colour appears not to be strongly  
98 limited by phylogenetic constraints [43,46,47,53,58], and it is of high value to understand  
99 what does promote very consistent flower colouration around the world when considering  
100 the visual capabilities of bees.

101 In a study at a field site near Berlin, Germany, flowers were most frequently found  
102 to be in the UV-BLUE region of colour space and these flowers also contained higher  
103 nectar rewards [28]. In the current study, we seek to understand if floral colours at a  
104 community level in Australia also show a significant association with nectar rewards that is  
105 consistent with the pattern found in Germany [28], and thus whether floral nectar reward  
106 might be an important driver linking bee preferences and flower colours.

107

108

## 109 **Materials and Methods**

110

### 111 **Sites and data collection**

112

113 We collected data from two natural communities in central Victoria, Australia:  
114 Baluk Willam Flora Reserve (37°55'32"S, 145°20'45"E), 40 km south east of Melbourne,  
115 and Boomers Reserve (37°37'39"S, 145°15'21"E), approximately 35 km north east of  
116 Melbourne. Both sites are *Eucalyptus* woodland with well-developed shrub and herb layers  
117 containing a high diversity of orchid species. These communities have been protected to  
118 maintain native vegetation. Flowers were sampled from March 2010 to May 2011. Species

119 were identified with the aid of several local floras [59–66]. A list of species included in  
120 this study is given in online Appendix A.

121

## 122 Nectar measurement

123

124 We used the floral nectar data of 59 bee pollinated flowering plant species in our  
125 analysis. Nectar collection and measurement methods are detailed in [54]. Briefly, newly  
126 opened flowers were placed in pollinator exclusion nets for 24 hours to allow nectar  
127 accumulation. Flowers were then excised, and soluble sugars were extracted by immersing  
128 whole flowers in known volume of distilled water followed by an acid treatment to reduce  
129 all sugars into hexoses. Subsequently, we measured the concentration of soluble sugars  
130 using standard spectrophotometric methods and back calculated the total sugar content of  
131 each flower [67]. Quantity of sucrose present in each flowering plant species is listed in  
132 online supplementary [54] and Appendix A.

133

## 134 Colour measurement

135

136 Reflectance spectra from 300 to 700 nm wavelength were measured on a minimum  
137 of three flowers for each species using an Ocean Optics spectrophotometer (Dunedin,  
138 Florida, USA) with a PX-2 pulsed xenon light source. A UV-reflecting white standard was  
139 used to calibrate the spectrophotometer. Spectra from multiple flowers were averaged  
140 within each species. For flowers with multiple colours, such as areas with and without a  
141 UV component, we obtained reflectance spectra of the two colours covering the largest  
142 surface area of the flower.

## 143 Colour space representation

144

145       Floral reflectance spectra were converted to positions in a hexagonal colour space,  
146 a two-dimensional representation of the excitation levels of the three different classes of  
147 photoreceptors in a hymenopteran insect's visual system [33]. This model is widely  
148 accepted as a representation of bee trichromatic vision in comparative studies of flower  
149 evolution [3,28,34,39,41,43,50,53,55,56,68,69]. The exact photoreceptor sensitivities of  
150 native Australian bees are currently unknown, but relying on the phylogenetic conservation  
151 of spectral sensitivity peaks of hymenopteran photoreceptors [29], we use a general  
152 hymenopteran visual model based on a vitamin A1 template for photopigments [70] with  
153 sensitivity peaks at 350 nm (ULTRAVIOLET: UV), 440 nm (BLUE: B) and 540 nm  
154 (GREEN: G) (cf. [56]). We calculated the relative probability of photon capture ( $P$ ) by  
155 each of the UV, B, and G photoreceptors by numerically integrating the product of the  
156 spectral sensitivity function of each one of the ( $i = 3$ ) photoreceptors  $S_i(\lambda)$ , the diffuse  
157 spectral reflectance of each flower  $I(\lambda)$  and the spectral distribution of the ambient  
158 illumination  $D(\lambda)$  expressed as photon flux [71]. All spectral functions were expressed  
159 from 300 to 650 nm at 10 nm steps:

160

$$161 \quad P_i = R_i \int_{300}^{650} S_i(\lambda) I(\lambda) D(\lambda) d\lambda . \quad (1)$$

162

163       The coefficient  $R_i$  in equation 1 represents von Kries adaptation and is used to normalize  
164 each of the photoreceptors to the illumination reflected from the background [33]:

165

$$166 \quad R_i = 1 / \int_{300}^{650} S_i(\lambda) I_B(\lambda) D(\lambda) d\lambda , \quad (2)$$

167

where  $I_B(\lambda)$  is the spectral reflectance of the background. We used the average reflectance from 20 species of *Eucalyptus* (Average Green Leaf) as background reflectance ( $I_B(\lambda)$ ) for our calculations. We used a open sky, daylight ambient illumination equivalent to CIE 6,500 K [72], that represent typical daylight conditions for foraging insects [73]. The transduction of photoreceptor captures ( $P$ ) into receptor excitations ( $E$ ) is given by

$$E = P / (P + I). \quad (3)$$

The receptor excitations ( $E_{UV}$ ,  $E_B$  and  $E_G$ ) are plotted on orthogonal axes, each of unit length, and the colour locus of a flower is the vector sum of the individual excitations. A colour locus can be represented by Cartesian coordinates in a hexagonal space using equations 4 [33]:

$$x = \sin(60^\circ)(E_G - E_{UV}) \quad (4a)$$

$$y = E_B - 0.5(E_G - E_{UV}). \quad (4b)$$

Colour contrast in Hexagon space was calculated as the Euclidean distance from the centre of the colour space, representing the adapting background, to the locus of a flower [74].

Hexagon coordinates for all flower species are given in online Appendix A.

## 188 **Data analysis**

### 190 **Colour categories**



For each species, we calculated the polar coordinates (angle and magnitude) of the floral colour locus in the hexagonal colour model (Fig 1a). The angle is a measurement of ‘hue’ in the hexagon space [33]. Samples were subsequently classified into one of the six colour categories proposed by [34] based on their respective hue value: BLUE (B), BLUE-GREEN (BG), GREEN (G), UV-GREEN (UG), UV (U), and UV-BLUE (UB).

## Does sugar content vary among colour categories?

Flowers were subsequently classified as either having a ‘high’ or ‘low’ soluble sugar content relative to the median soluble sugar amount for the entire flower sample, following the method used in [28,75,76]. We used a set of contingency tables to test for significant differences in proportion of high and low soluble sugar content per color category, against a null hypothesis of equality of proportion per color group. Contingency tables excluded the single sample present in the UV color group (see results section for details). To avoid problems associated with using the  $\chi^2$  distribution with small sample sizes in some colour categories, probability values from the chi-square test were obtained using 100,000 Monte Carlo simulations.

A second contingency test was conducted after excluding three species from the family Asteraceae because the soluble sugar content for these species was measured from a compound ‘head’ rather than individual flowers. Median soluble sugar amount was thus recalculated from the remaining species and the response variable was reformulated using the updated soluble sugar threshold value.

Finally, we constructed a third table excluding plant species in both Asteraceae and orchidaceae, given the prevalence of potential food deception in many orchids [77,78]. As

216 before, the median soluble sugar content was updated, and the remaining flower species  
217 were subsequently reclassified as being high or low.

218

## 219 Correlation between sugar content and chromatic contrast

220

221 In addition to hue, chromatic contrast with a background (see *Colour space*  
222 *representation* above) is an element of colour that may be relevant to pollinators. We  
223 tested for a potential correlation between chromatic contrast of flower loci to the leaf green  
224 background in hexagon colour space and soluble sugar content. The analysis was done first  
225 on the entire data set, and subsequently for the two data subsets following the same  
226 rationale used for the contingency tests. All correlation tests were performed using  
227 Kendall's tau ( $\tau$ ) statistic as the test makes no assumptions on the underlying distribution  
228 of the data [79]. All analyses were performed using R base package version 3.6.1 (05-07-  
229 2019).

230

231

232 **Fig 1: Flower colour and nectar in Australian native plant flowers.** a. Distribution of  
233 59 flowering plant species in hexagon colour space: non-orchids (●) and orchids (\*). b.  
234 Frequency of sampled species classified on each of the six Hexagon categories along with  
235 the corresponding global pattern of distribution (red line) of plant species taken from the  
236 surveys of plant communities in Germany, Australia, and Nepal [34,43,46,56]. c. Plant  
237 flower soluble sugars by colour category; thick lines represent medians, boxes represent  
238 the 25% and 75% interquartile ranges, and thin vertical bars represent 2.5 and 97.5 %  
239 quantiles of the data distribution. Names of the different Hexagon sectors are abbreviated:  
240 BLUE (B), BLUE-GREEN (BG), GREEN (G), UV-GREEN (UG), UV (U), and UV-  
241 BLUE (UB) as described by [34].

242

243

## 244 Results

245

246 The distribution of species among hexagon sectors appeared uneven (Fig 1a, b), as  
247 did the distribution of soluble floral sugar per sector (Fig 1c). Only one sample was  
248 classified into the UV hexagon sector: *Hypericum pygmae* (Clusiaceae) and this hexagon  
249 sector was thus excluded from all subsequent analyses. The scarcity of flowers in UV  
250 sector is consistent with previous studies [34].

251 Median soluble sugar content per flower  $\pm$  median absolute deviation (MAD) for  
252 the sample excluding *Hypericum pygmae* was  $392 \pm 377$   $\mu\text{g}$ . Following categorization of  
253 species based on this threshold value (Fig 2a), we found no significant difference among  
254 hexagon sectors in the proportion of species with a high sugar content ( $\chi^2 = 3.97$ ,  $P =$   
255  $0.466$ ).

256 Results from the second contingency table (median sugar soluble sugar =  $383 \pm$   
257  $359$   $\mu\text{g}$ ), which excluded species from the family Asteraceae also failed to reject the null  
258 hypothesis of equality in the proportion of species with a high amount of soluble sugar ( $\chi^2$   
259  $= 2.15$ ,  $P = 0.765$ , Fig 2b).

260

261

262

263 **Fig 2: Proportion of species with a ‘high’ amount of soluble sugar** for each one of the  
264 five categories including (panel a) and excluding species from the family Asteraceae (panel  
265 b).

266

267

268 Finally, the threshold soluble sugar value for non-orchid, non-aster species  
269 contingency table was  $367 \pm 406 \mu\text{g}$ . For the third model we also found no evidence  
270 rejecting the null hypothesis of equality in the proportion of high-reward species among  
271 the different colour categories ( $\chi^2 = 2.97$ ,  $P = 0.693$ ). This result thus suggests that the low  
272 amount of soluble sugars present in orchid species at our field site was not a factor  
273 affecting a potentially the outcome of the initial model.

274 Chromatic contrast revealed no significant relation to floral sugar content at our  
275 field site. Tests using Kendall's tau ( $\tau$ ) statistic failed to reject the null hypothesis of  
276 independence between soluble nectar content and chromatic contrast for all the subsets  
277 considered (Table 1).

278

279

280

281 **Table 1:** Results of correlation test testing for a potential relation between soluble sugar  
282 content and chromatic contrast considering various sample subsets: Complete data set  
283 including all flowers, data set excluding the only species allocated to the UV hexagon  
284 sector *Hypericum pygmae*, subset also excluding family Asteraceae, and all non-orchid  
285 species. A non-parametric (Kendall tau ( $\tau$ )) correlation coefficient was calculated in all  
286 cases.

287

288

| Data set                      | $\tau$ | P     |
|-------------------------------|--------|-------|
| Complete data set             | -0.016 | 0.86  |
| Excluding flower in UV sector | -0.019 | 0.83  |
| Excluding Asteraceae          | -0.059 | 0.528 |
| Excluding Orchidaceae         | 0.003  | 0.999 |

289

290

291

292

## 293 Discussion

294

295       It was hypothesised by Darwin [80] that insects may evolve innate preferences to  
 296 aid the efficient location of profitable flowers, and bees do have both innate spatial [5,81]  
 297 and colour [28,35–40] preferences. In Germany, where important bee species like  
 298 honeybees and bumbles have innate preferences for short wavelength blue flowers, it was  
 299 found that flowers in the UV-BLUE category contained significantly higher volumes of  
 300 nectar than those in other hue categories in bee colour space [28]. Several studies suggest  
 301 that nectar volume can influence the behaviour of foraging bees [11,12,19,20,82]. Indeed,  
 302 it has also been shown that introduced species with flowers that contain higher volume  
 303 rewards can out-compete resident flowers by attracting more bee pollinators [83].

304       Nonetheless, flower colours in different parts of the world have very similar  
 305 distributions in bee colour space [56], which is also consistent with evidence that bees have  
 306 phylogenetically conserved colour visual systems including preferences for short  
 307 wavelength stimuli [29,43]. Thus, understanding whether flowers in different communities  
 308 have colours that predict higher reward levels in a consistent fashion is of value for  
 309 understanding what traits promote bee choices, and the potential major drivers that  
 310 influence flower signal evolution.

311       In the current study we considered flower colour signaling from two communities  
 312 in south-eastern Australia that had similar flower colours in bee colour space, and were  
 313 also similar to bee pollinated flower colours found elsewhere across Australia and around  
 314 the world [3,43,46,55,56]. We found no evidence that a particular hue predicted a higher  
 315 reward level within flowers. These results from native plant communities suggest that a  
 316 simple, direct link between flower rewards and the preferred bee hue of ‘blue’ is not an  
 317 explanation of flower colour preferences in Australia, and may not be in other locations

318 around the world. Reciprocal selection between plants and their pollinators can reach  
319 different evolutionary equilibria among local populations, leading to a geographic mosaic  
320 of trait values of the interacting parties [84]. The previously observed higher rewards for  
321 bee preferred blue flowers in Germany [28] may thus be a local equilibrium, and it will be  
322 of value to map more communities to understand if and how flower colour predicts nectar  
323 rewards around the world.

324         Given the evidence that bee colour preferences may influence how flowers evolve  
325 similar spectral signals at several different locations around the world [34,43,46,56,57,85],  
326 it is interesting to consider what traits other than nectar rewards might promote bee  
327 preferences. Plausible alternative lines of investigation could include how the spectral  
328 overlap of photoreceptors when combined with opponent processes at a neural level  
329 enhance both colour discrimination [55,86–88] and colour detection [89] in a way that is  
330 most efficient for finding flowers [90]. This in turn could enhance neural mechanisms to  
331 promote innate colour preferences. By itself, this mechanism of spectral tuning cannot be  
332 the sole explanation for a stronger blue preference, since there is also spectral overlap and  
333 enhanced signal processing at longer wavelengths [55,85]. However, many common  
334 background stimuli reflect at longer wavelengths [91], so having innate brain preferences  
335 for shorter wavelength ‘blue’ stimuli might enable bees to efficiently detect stimuli that  
336 have a very high probability of being a rewarding flower given that very few natural  
337 colours are blue. Interestingly, UV absorbing flowers that appear ‘white’ to humans are  
338 very common within this short wavelength range of preferred colours in bee colour space,  
339 and additionally have the advantage of having strong modulation of the long wavelength  
340 bee receptor that is implicated in enhancing signal detection at a distance [68,92–95].

341 To better understand the complexities of these multiple complex factors it is  
342 important to collect more flower data at a plant community level around the world, as well  
343 as continue to map the sensory capabilities of different pollinators [16,87].

344

345

346 **Acknowledgements:** We thank Parks Victoria and the Department of Sustainability  
347 and Environment (permit number 10005294) for permission to work at the field sites  
348 between 2009-2013. We thank Professor Graham H. Pyke for the suggestions and  
349 comments about nectar rewards in the previous version of manuscript.

350

351 **Funding:** MS was supported by a Monash Graduate Scholarship (MGS), Monash  
352 International Postgraduate Research Scholarship (MIPRS), and Faculty of Sciences  
353 Postgraduate Publication Award (PPA) while collecting data (2009-2013). AGD was  
354 supported by Australian Research Council Discovery Projects grants DP160100161.

355

356 **Author contributions:** MS, AGD and MB designed the study. MS conducted the  
357 field work, data collections, plant identification. MS and MB did the data curations and lab  
358 experiment. MS, and AGD mapped the floral reflectance spectra to the bee-vision colour  
359 space model. MS, JEG, MB, AGD performed the statistical analyses. All authors  
360 interpreted the results and wrote the manuscript. The authors declare that they have no  
361 conflict of interest involving the work reported here.

362

363

364

## 365 References

366

- 367 1. Kevan PG, Lane MA. Flower petal microtexture is a tactile cue for bees. *Proc Natl*  
368 *Acad Sci.* 1985;82: 4750–4752.
- 369 2. Leonard A, Masek P. Multisensory integration of colors and scents: insights from  
370 bees and flowers. *J Comp Physiol A.* 2014; 1–12. doi:10.1007/s00359-014-0904-4
- 371 3. Kantsa A, Raguso RA, Dyer AG, Sgardelis SP, Olesen JM, Petanidou T.  
372 Community-wide integration of floral colour and scent in a Mediterranean  
373 scrubland. *Nat Ecol Evol.* 2017;1: 1502–1510. doi:10.1038/s41559-017-0298-0
- 374 4. Shrestha M, Garcia JE, Bukovac Z, Dorin A, Dyer AG, Shrestha M, et al.  
375 Pollination in a new climate: Assessing the potential influence of flower temperature  
376 variation on insect pollinator behaviour. *PLoS One.* 2018;13: e0200549.
- 377 5. Howard S, Shrestha M, Schramme J, Garcia JE, Avarguès- A, Greentree AD, et al.  
378 Honeybee preferences and innate learning of flower achromatic morphologies. *Curr*  
379 *Zool.* 2019;65: 457–465.
- 380 6. Barth FG. *Insects and flowers. The biology of a partnership.* 1985, Princeton:  
381 Princeton University Press USA.
- 382 7. PG K, Backhouse WG. Color vision: Ecology and evolution in making the best of  
383 the photic environment. *Color vision: Perspectives from different disciplines.* 1998.  
384 pp. 163–183.
- 385 8. Chittka L., Spaethe J., Schmidt A., Hickelsberger A. Adaptation, constraint, and  
386 chance in the evolution of flower color and pollinator color vision. In: Chittka L,



- 387 Thomson JD (eds) Cognitive ecology of pollination. Cambridge University Press,  
388 Cambridge, pp106-126. 2001;
- 389 9. Fenster CB, Armbruster WS, Wilson P, Dudash MR, Thomson JD. Pollination  
390 syndromes and floral specialization. *Annu Rev Ecol Evol Syst.* 2004;35: 375–403.  
391 doi:10.1146/annurev.ecolsys.34.011802.132347
- 392 10. Mark D. Rausher, Rausher MD. Evolutionary transitions in floral color. *Int J Plant*  
393 *Sci.* 2008;169: 7–21. doi:10.1086/523358
- 394 11. Waser NM, Price M V. The effect of nectar guides on pollinator preference:  
395 experimental studies with a montane herb. *Oecologia.* 1985;67: 121–126.  
396 doi:10.1007/BF00378462
- 397 12. Willmer PG. The effects of insect visitors on nectar constituents in temperate plants.  
398 *Oecologia.* 1980;47: 270–277. doi:10.1007/BF00346832
- 399 13. Stpiczyńska M, Nepi M, Zych M. Nectaries and male-biased nectar production in  
400 protandrous flowers of a perennial umbellifer *Angelica sylvestris* L. (Apiaceae).  
401 *Plant Syst Evol.* 2015;301: 1099–1113. doi:10.1007/s00606-014-1152-3
- 402 14. Seeley TD, Camazine S, Sneyd J. Collective decision-making in honey bees: how  
403 colonies choose among nectar sources. *Behav Ecol Sociobiol.* 1991;28: 277–290.
- 404 15. Nepi M, Grasso DA, Mancuso S. Nectar in plant–insect mutualistic relationships:  
405 From food reward to partner manipulation. *Front Plant Sci.* 2018;9: 1–14.  
406 doi:10.3389/fpls.2018.01063
- 407 16. Dyer AG, Paulk AC, Reser DH. Colour processing in complex environments:  
408 insights from the visual system of bees. *Proc R Soc London B Biol Sci. The Royal*  
409 *Society;* 2011;278: 952–959.

- 410 17. Chalcoff VR, Gleiser G, Ezcurra C, Aizen MA. Pollinator type and secondarily  
411 climate are related to nectar sugar composition across the angiosperms. *Evol Ecol.*  
412 2017;31: 585–602. doi:10.1007/s10682-017-9887-2
- 413 18. Heil M. Extrafloral Nectar at the Plant-Insect Interface: A Spotlight on Chemical  
414 Ecology, Phenotypic Plasticity, and Food Webs. *Annu Rev Entomol.* 2015;60: 213–  
415 232. doi:doi:10.1146/annurev-ento-010814-020753
- 416 19. van Rijn PCJ, Wäckers FL. Nectar accessibility determines fitness, flower choice  
417 and abundance of hoverflies that provide natural pest control. *J Appl Ecol.* 2016;53:  
418 925–933. doi:10.1111/1365-2664.12605
- 419 20. Gil M, De Marco RJ. Honeybees learn the sign and magnitude of reward variations.  
420 *J Exp Biol.* 2009;212: 2830–2834. doi:10.1242/jeb.032623
- 421 21. Kemp DJ, Herberstein ME, Fleishman LJ, Endler JA, Bennett ATD, Dyer AG, et al.  
422 An integrative framework for the appraisal of coloration in nature. *Am Nat.*  
423 2015;185: 705–724.
- 424 22. Knight TM, Steets JA, Vamosi JC, Mazer SJ, Burd M, Campbell DR, et al. Pollen  
425 Limitation of Plant Reproduction: Pattern and Process. *Annu Rev Ecol Evol Syst.*  
426 2005;36: 467–497. doi:10.1146/annurev.ecolsys.36.102403.115320
- 427 23. Chittka L, Thomson JD, Waser NM. Flower constancy, insect psychology, and plant  
428 evolution. *Naturwissenschaften.* 1999;86: 361–377. doi:10.1007/s001140050636
- 429 24. Dyer AG, Chittka L. Biological significance of distinguishing between similar  
430 colours in spectrally variable illumination: bumblebees (*Bombus terrestris*) as a case  
431 study. *J Comp Physiol A.* 2004;190: 105–114.

- 432 25. Burns JG, Dyer AG. Diversity of speed-accuracy strategies benefits social insects.  
433 Curr Biol. 2008;18: R953–R954.
- 434 26. Bukovac Z, Dorin A, Dyer A. A-Bees See: A simulation to assess social bee visual  
435 attention during complex search tasks. 2013; 276–283. doi:10.7551/978-0-262-  
436 31709-2-ch042
- 437 27. Seeley TD. The wisdom of the hive: the social physiology of honey bee colonies.  
438 Harvard University Press; 2009.
- 439 28. Giurfa M, Núñez J, Chittka L, Menzel R. Colour preferences of flower-naïve  
440 honeybees. J Comp Physiol A. 1995;177: 247–259. doi:10.1007/bf00192415
- 441 29. Briscoe AD, Chittka L. The evolution of color vision in insects. Annu Rev Entomol.  
442 Annual Reviews 2001;46: 471–510.
- 443 30. Kien J, Menzel R. Chromatic properties of interneurons in the optic lobes of the bee.  
444 J Comp Physiol. 1977;113: 17–34.
- 445 31. Yang E-C, Lin H-C, Hung Y-S. Patterns of chromatic information processing in the  
446 lobula of the honeybee, *Apis mellifera* L. J Insect Physiol. 2004;50: 913–925.  
447 doi:http://dx.doi.org/10.1016/j.jinsphys.2004.06.010
- 448 32. Paulk AC, Gronenberg W. Higher order visual input to the mushroom bodies in the  
449 bee, *Bombus impatiens*. Arthropod Struct Dev. 2008;37: 443–458.  
450 doi:10.1016/j.asd.2008.03.002
- 451 33. Chittka L. The colour hexagon: a chromaticity diagram based on photoreceptor  
452 excitations as a generalized representation of colour opponency. J Comp Physiol A.  
453 1992;170: 533–543. doi:10.1007/BF00199331

- 454 34. Chittka L, Shmida A, Troje N, Menzel R, Chittka L, Shmida A, Troje N MR.  
455 Ultraviolet as a component of flower reflections, and the colour perception of  
456 hymenoptera. *Vision Res.* 1994;34: 1489–1508. doi:[http://dx.doi.org/10.1016/0042-](http://dx.doi.org/10.1016/0042-6989(94)90151-1)  
457 6989(94)90151-1
- 458 35. Menzel R. Untersuchungen zum erlernen von spektralfarben durch die honigbiene  
459 (*Apis mellifica*). *Z Vgl Physiol.* 1967;56: 22–62. doi:10.1007/BF00333562
- 460 36. Gumbert A. Color choices by bumble bees (*Bombus terrestris*): innate preferences  
461 and generalization after learning. *Behav Ecol Sociobiol.* 2000;48: 36–43.  
462 doi:10.1007/s002650000213
- 463 37. Morawetz L, Svoboda A, Spaethe J, Dyer AG. Blue colour preference in honeybees  
464 distracts visual attention for learning closed shapes. *J Comp Physiol A.* 2013;199:  
465 817–827.
- 466 38. Raine NE, Ings TC, Dornhaus A, Saleh N, Chittka L. Adaptation, genetic drift,  
467 pleiotropy, and history in the evolution of bee foraging behavior. *Adv Study Behav.*  
468 2006;36: 305–354. doi:10.1016/S0065-3454(06)36007-X
- 469 39. Raine NE, Chittka L. Colour preferences in relation to the foraging performance and  
470 fitness of the bumblebee *Bombus terrestris*. *Uludag Bee J.* 2005;5: 145–150.
- 471 40. Raine NE, Chittka L. The adaptive significance of sensory bias in a foraging  
472 context: floral colour preferences in the bumblebee *Bombus terrestris*. *PLoS One.*  
473 2007;2: e556.
- 474 41. Dyer AG, Boyd-Gerny S, Shrestha M, Lunau K, Garcia JE, Koethe S, et al. Innate  
475 colour preferences of the Australian native stingless bee *Tetragonula carbonaria*  
476 Sm. *J Comp Physiol A.* 2016;202: 603–613. doi:10.1007/s00359-016-1101-4

- 477 42. Dyer AG, Boyd-Gerny S, Shrestha M, Garcia JE, van der Kooi CJ, Wong BBM.  
478 Colour preferences of *Tetragonula carbonaria* Sm. stingless bees for colour morphs  
479 of the Australian native orchid *Caladenia carnea*. J Comp Physiol A. 2019;205:  
480 347–361. doi:10.1007/s00359-019-01346-0
- 481 43. Shrestha M, Dyer AG, Garcia JE, Burd M. Floral colour structure in two Australian  
482 herbaceous communities: it depends on who is looking. Ann Bot. 2019;124: 221–  
483 232. doi:10.1093/aob/mcz043
- 484 44. Arnold SJ, Savolainen V, Chittka L. Flower colours along an alpine altitude  
485 gradient, seen through the eyes of fly and bee pollinators. Arthropod Plant Interact.  
486 2009;3: 27–43. doi:10.1007/s11829-009-9056-9
- 487 45. McEwen JR, Vamosi JC. Floral colour versus phylogeny in structuring subalpine  
488 flowering communities. Proc R Soc B Biol Sci. 2010;277: 2957–2965.  
489 doi:10.1098/rspb.2010.0501
- 490 46. Shrestha M, Dyer AG, Bhattarai P, Burd M. Flower colour and phylogeny along an  
491 altitudinal gradient in the Himalayas of Nepal. J Ecol. 2014;102: 126–135.  
492 doi:10.1111/1365-2745.12185
- 493 47. Ohashi K, Makino TT, Arikawa K. Floral colour change in the eyes of pollinators:  
494 testing possible constraints and correlated evolution. Funct Ecol. 2015;29: 1144–  
495 1155. doi:10.1111/1365-2435.12420
- 496 48. Makino TT, Yokoyama J. Nonrandom Composition of Flower Colors in a Plant  
497 Community: Mutually Different Co-Flowering Natives and Disturbance by Aliens.  
498 PLoS One. 2015;10: e0143443. doi:10.1371/journal.pone.0143443

- 499 49. Kantsa A, Raguso RA, Dyer AG, Olesen JM, Tscheulin T, Petanidou T.  
500 Disentangling the role of floral sensory stimuli in pollination networks. *Nat*  
501 *Commun.* 2018;9: 1041. doi:10.1038/s41467-018-03448-w
- 502 50. Gray M, Stansberry MJ, Lynn JS, Williams CF, White TE, Whitney KD. Consistent  
503 shifts in pollinator-relevant floral coloration along Rocky Mountain elevation  
504 gradients. *J Ecol.* 2018;106: 1910–1924. doi:10.1111/1365-2745.12948
- 505 51. Kemp JE, Ellis AG. Cryptic petal coloration decreases floral apparency and  
506 herbivory in nocturnally closing daisies. *Funct Ecol.* 2019; 1–12. doi:10.1111/1365-  
507 2435.13423
- 508 52. de Camargo MGG, Lunau K, Batalha MA, Brings S, de Brito VLG, Morellato LPC.  
509 How flower colour signals allure bees and hummingbirds: a community-level test of  
510 the bee avoidance hypothesis. *New Phytol.* 2019;222: 1112–1122.  
511 doi:10.1111/nph.15594
- 512 53. Kemp JE, Bergh NG, Soares M, Ellis AG, Jurene E Kemp, Nicola G. Bergh MS&  
513 AGE. Dominant pollinators drive non-random community assembly and shared  
514 flower colour patterns in daisy communities. *Ann Bot.* 2018; 123(2): 277-288.  
515 <http://dx.doi.org/10.1093/aob/mcy126>
- 516 54. Shrestha M, Burd M, Garcia JE, Dorin A, Dyer AG. Colour evolution within orchids  
517 depends on whether the pollinator is a bee or a fly. *Plant Biol.* 2019; 745–752.  
518 doi:doi:10.1111/plb.12968
- 519 55. Chittka L, Menzel R. The evolutionary adaptation of flower colours and the insect  
520 pollinators' colour vision. *J Comp Physiol A.* 1992;171: 171–181.  
521 doi:10.1007/BF00188925

- 522 56. Dyer AG, Boyd-Gerny S, McLoughlin S, Rosa MGP, Simonov V, Wong BBM.  
523 Parallel evolution of angiosperm colour signals: common evolutionary pressures  
524 linked to hymenopteran vision. *Proc R Soc B*. 2012;279: 3606–3615.
- 525 57. Bischoff M, Lord JM, Robertson AW, Dyer AG, M, Bischoff, JM, Lord, AW,  
526 Robertson AGD. Hymenopteran pollinators as agents of selection on flower colour  
527 in the New Zealand mountains: salient chromatic signals enhance flower  
528 discrimination. *New Zeal J Bot*. 2013;51: 181–193.  
529 doi:10.1080/0028825X.2013.806933
- 530 58. Shrestha M, Dyer AG, Boyd-gerny S, Wong BBM, Burd M. Shades of red: bird-  
531 pollinated flowers target the specific colour discrimination abilities of avian vision.  
532 *New Phytol*. 2013;198: 301–310. doi:10.1111/nph.12135
- 533 59. Jeans J, Backhouse G. *Wild Orchids of Victoria Australia*. Published by Rudie H.  
534 Kuiter publisher. 2006;
- 535 60. Jones DL. *A complete guide to Native Orchids of Australia*. New Holland  
536 Publishers (Australia) Pty Ltd. 2006;
- 537 61. Richardson FJ, Richardson RJ, Shepherd RCH. *Weeds of the South-East: an*  
538 *identification guide for Australia*. Published by R.G. and F. J. Richardson, Australia  
539 (www.weedinfo.co.au). 2011;
- 540 62. Ross JH. *A census of the vascular plants of Victoria*. Published by the National  
541 Herbarium of Victoria, Royal Botanical Gardens, Victoria, 3141, Australia. 2000;
- 542 63. Corrick MG, Fuhrer BA. *Wild flowers of Victoria and adjoining areas*. 2008;
- 543 64. Walsh NG, Entwisle TJ, N.G. W, Walsh NG, Entwisle TJ. *Flora of Victoria*, vol.3,  
544 Inkata Press, Melbourne. 1996;

- 545 65. Walsh NG, Entwisle TJ, N.G. W, Walsh NG, Entwisle TJ. Flora of Victoria,vol.2,  
546 Inkata Press, Melbourne. 1994.
- 547 66. Walsh NG, Entwisle TJ, N.G. W, Walsh NG, Entwisle TJ. Flora of Victoria, vol 4,  
548 Inkata Press, Melbourne. 1999.
- 549 67. Roberts RBR. Spectrophotometric Analysis of Sugars Produced by Plants and  
550 Harvested by Insects. J Apic Res. 1979;18: 191–195.  
551 doi:10.1080/00218839.1979.11099966
- 552 68. Dyer AG, Streinzer M, Garcia J. Flower detection and acuity of the Australian  
553 native stingless bee *Tetragonula carbonaria* Sm. J Comp Physiol A. 2016;202: 629–  
554 639. doi:10.1007/s00359-016-1107-y
- 555 69. Whitney HM, Chittka L, Bruce TJA, Glover BJ. Conical Epidermal Cells Allow  
556 Bees to Grip Flowers and Increase Foraging Efficiency. Curr Biol. 2009;19: 948–  
557 953. doi:http://dx.doi.org/10.1016/j.cub.2009.04.051
- 558 70. Stavenga DG, Smits RP, Hoenders BJ. Simple exponential functions describing the  
559 absorbance bands of visual pigment spectra. Vision Res. 1993;33: 1011–1017.  
560 doi:http://dx.doi.org/10.1016/0042-6989(93)90237-Q
- 561 71. Endler JA. On the measurement and classification of colour in studies of animal  
562 colour patterns. Biol J Linn Soc.; 1990;41: 315–352. doi:10.1111/j.1095-  
563 8312.1990.tb00839.x
- 564 72. Judd DB, MacAdam DL, Wyszecki G, Budde HW, Condit HR, Henderson ST, et al.  
565 Spectral distribution of typical daylight as a function of correlated color  
566 temperature. J Opt Soc Am. OSA; 1964;54: 1031–1040.  
567 doi:10.1364/JOSA.54.001031



- 568 73. Garcia JE, Spaethe J, Dyer AG. The path to colour discrimination is S-shaped:  
569 behaviour determines the interpretation of colour models. *J Comp Physiol A*  
570 *Neuroethol Sensory, Neural, Behav Physiol.* 2017;203: 983–997.  
571 doi:10.1007/s00359-017-1208-2
- 572 74. Spaethe J, Tautz J, Chittka L. Visual constraints in foraging bumblebees: Flower  
573 size and color affect search time and flight behavior. *Proc Natl Acad Sci.* 2001;98:  
574 3898–3903. doi:10.1073/pnas.071053098
- 575 75. Düll R, Kutzelnigg H. Botanisch-ökologisches Exkursionstaschenbuch: das  
576 Wichtigste zur Biologie ausgewählter wildwachsender und kultivierter Farn-und  
577 Blütenpflanzen Deutschlands. Quelle & Meyer; 1994.
- 578 76. Pritsch G. (1985) Bienenweide. VEB Deutscher Landwirtschaftsverlag. Berlin,  
579 Germany.; 1985.
- 580 77. Dafni A. Mimicry and deception in pollination. *Annu Rev Ecol Syst.* 1984;15: 259–  
581 278. doi:10.1146/annurev.es.15.110184.001355
- 582 78. Ackerman JD. Pollination of tropical and temperate orchids. *Proceedings of the*  
583 *Eleventh World Orchid Conference Miami, Florida: American Orchid Society.*  
584 1985. pp. 98–101.
- 585 79. Zar HR. Biostatistical analysis, 4<sup>th</sup> edition, 1999, Prentice Hall, New Jersey, USA.
- 586 80. Darwin C. The effects of cross and self fertilisation in the vegetable kingdom. J.  
587 Murray, London; 1877.
- 588 81. Lehrer M, Horridge GA, Zhang SW, Gadagkar R. Shape vision in bees: Innate  
589 preference for flower-like patterns. *Philos Trans R Soc B Biol Sci.* 1995;347: 123–  
590 137. doi:10.1098/rstb.1995.0017

- 591 82. Kunze J, Chittka L. Butterflies and bees fly faster when plants feed them more  
592 nectar. Goettingen Neurobiology Report. 1996. p. 109.
- 593 83. Chittka L., SS. Successful invasion of a floral market. Nature. 2001;411: 2001.
- 594 84. Paudel BR, Shrestha M, Burd M, Adhikari S, Sun YS LQ. Coevolutionary  
595 elaboration of pollination-related traits in an alpine ginger (*Roscoeia purpurea*) and a  
596 tabanid fly in the Nepalese Himalayas. New Phytol. 2016;211: 1402–1411.  
597 doi:10.1111/nph.13974
- 598 85. Suzuki MF, Ohashi K. How does a floral colour-changing species differ from its  
599 non-colour-changing congener? – a comparison of trait combinations and their  
600 effects on pollination. Funct Ecol. 2014;28: 549–560. doi:10.1111/1365-2435.12209
- 601 86. von Helversen O. Zur spektralen unterschiedsempfindlichkeit der honigbiene. J  
602 Comp Physiol. Springer; 1972;80: 439–472.
- 603 87. Chittka L, Wells H. Color vision in bees: mechanisms, ecology and evolution. In:  
604 Prete, F.: Complex Worlds from simpler nervous systems; MIT Press, Boston pp.  
605 165-191. 2004;
- 606 88. Peitsch D, Fietz A, Hertel H, de Souza J, Ventura DF, Menzel R. The spectral input  
607 systems of hymenopteran insects and their receptor-based colour vision. J Comp  
608 Physiol A. Springer; 1992;170: 23–40.
- 609 89. Bukovac Z, Dorin A, Finke V, Shrestha M, Garcia J, Avarguès-Weber A, et al.  
610 Assessing the ecological significance of bee visual detection and colour  
611 discrimination on the evolution of flower colours. Evol Ecol. 2017;31: 153–172.  
612 doi:10.1007/s10682-016-9843-6

- 613 90. Chittka L. Optimal sets of color receptors and color opponent systems for coding of  
614 natural objects in insect vision. *J Theor Biol.* 1996;181: 179–196.  
615 doi:10.1006/jtbi.1996.0124
- 616 91. Bukovac Z, Shrestha M, Garcia JE, Burd M, Dorin A, Dyer AG. Why background  
617 colour matters to bees and flowers. *J Comp Physiol A.* 2017;203: 1–12.  
618 doi:10.1007/s00359-017-1175-7
- 619 92. Giurfa M, Vorobyev M, Kevan P, Menzel R. Detection of coloured stimuli by  
620 honeybees: Minimum visual angles and receptor specific contrasts. *J Comp Physiol*  
621 *A.* Springer-Verlag; 1996;178: 699–709. doi:10.1007/BF00227381
- 622 93. Stach S, Benard J, Giurfa M. Local-feature assembling in visual pattern recognition  
623 and generalization in honeybees. *Nature.* 2004;429: 758–761.  
624 doi:10.1038/nature02594
- 625 94. Dyer AG, Spaethe J, Prack S. Comparative psychophysics of bumblebee and  
626 honeybee colour discrimination and object detection. *J Comp Physiol A.* Springer-  
627 Verlag; 2008;194: 617–627. doi:10.1007/s00359-008-0335-1
- 628 95. Avarguès-Weber A, Giurfa M. Cognitive components of color vision in honey bees:  
629 how conditioning variables modulate color learning and discrimination. *J Comp*  
630 *Physiol A.* 2014;200: 449–461.

631

## 632 **Supplementary information:**

633

634 **Appendix A:** provides the data used in current analysis. The ‘.csv’ file includes hexagon  
635 x and y unit, sucrose amount (microgram) and pollination categorization.

**a.**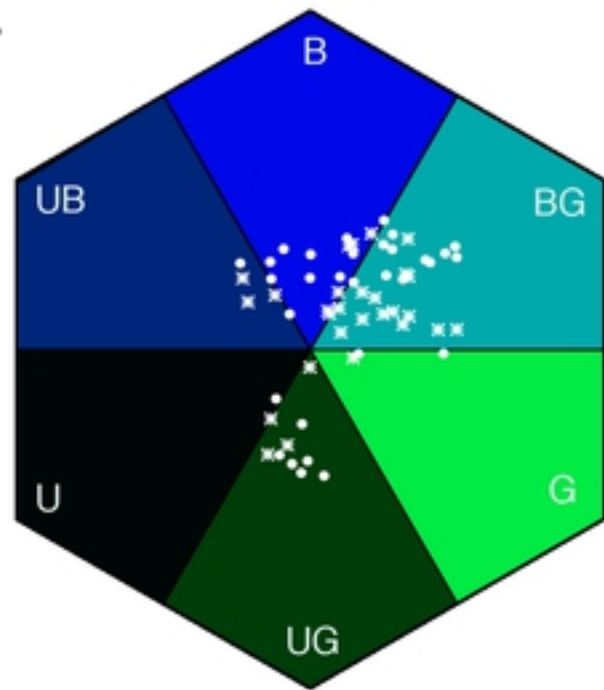**b.**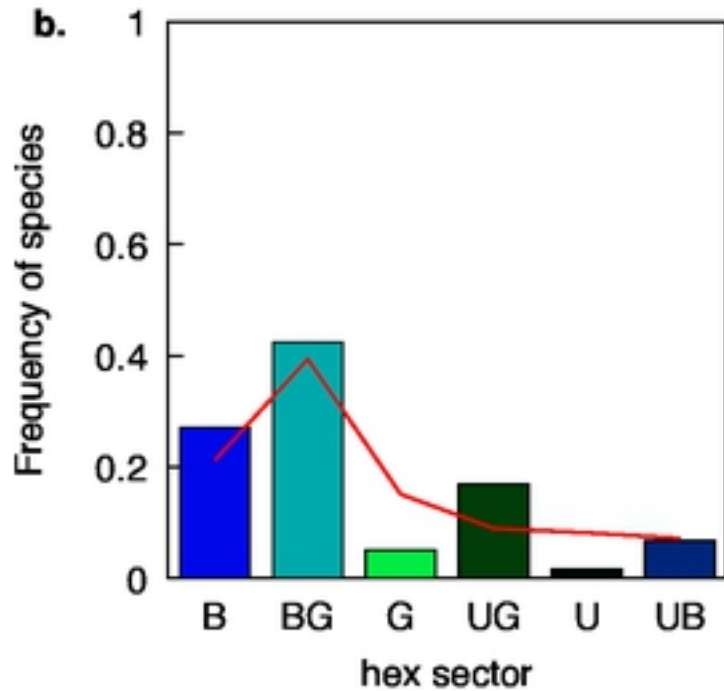**c.**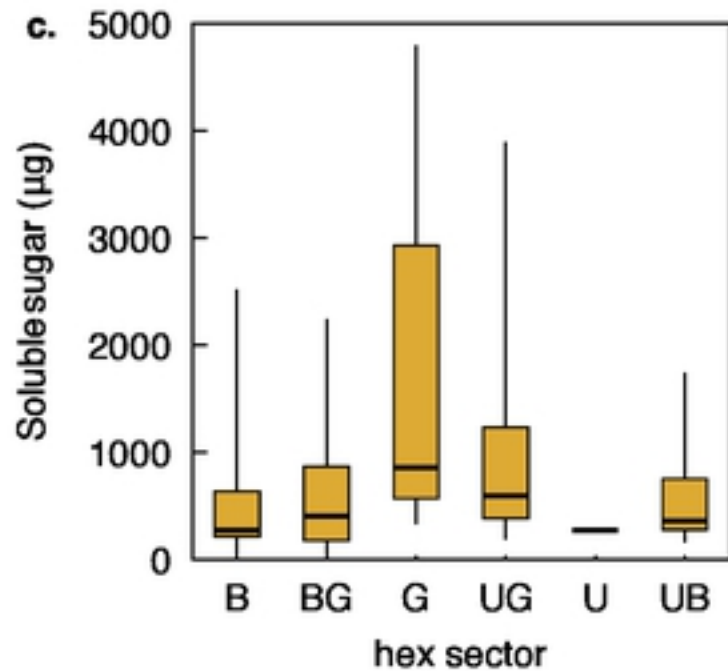

Figure 1

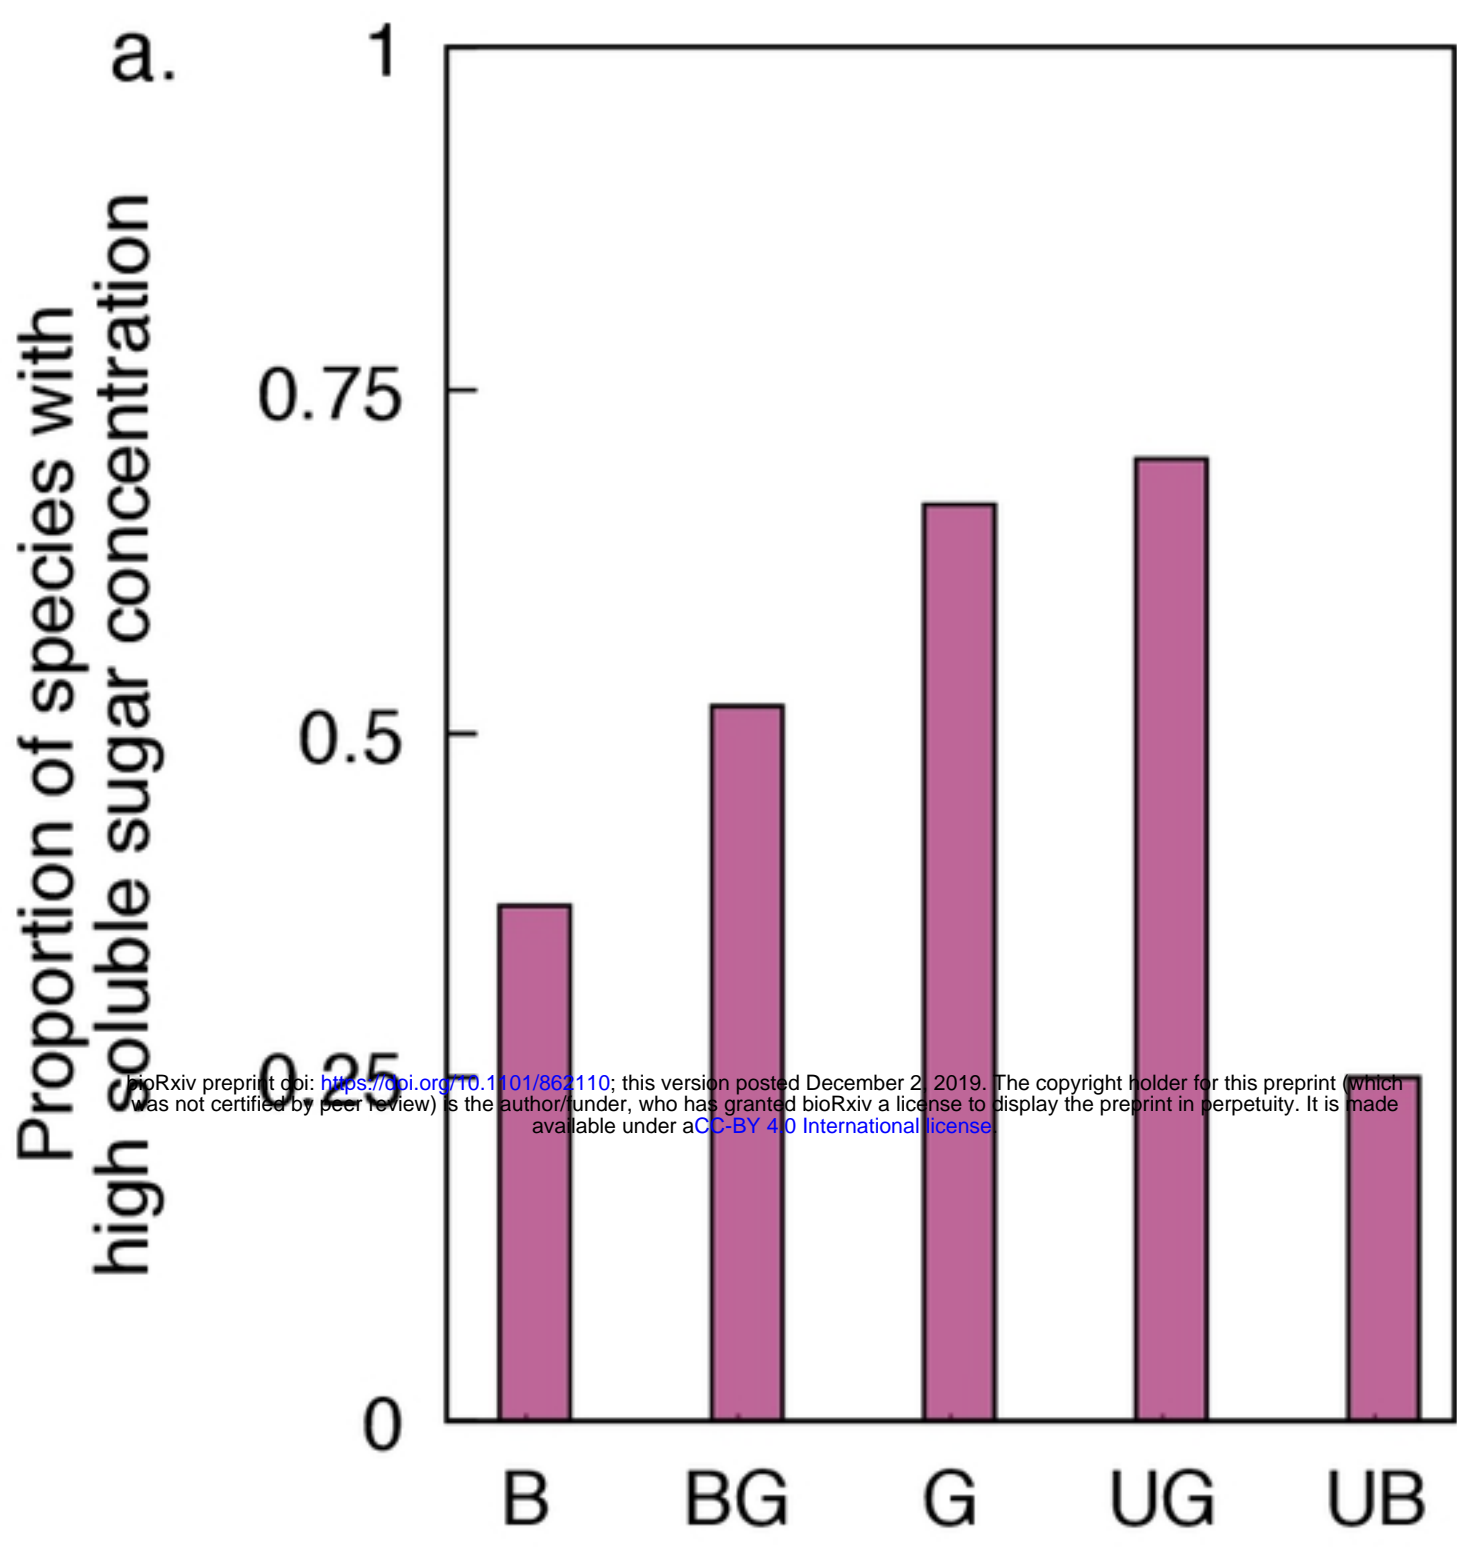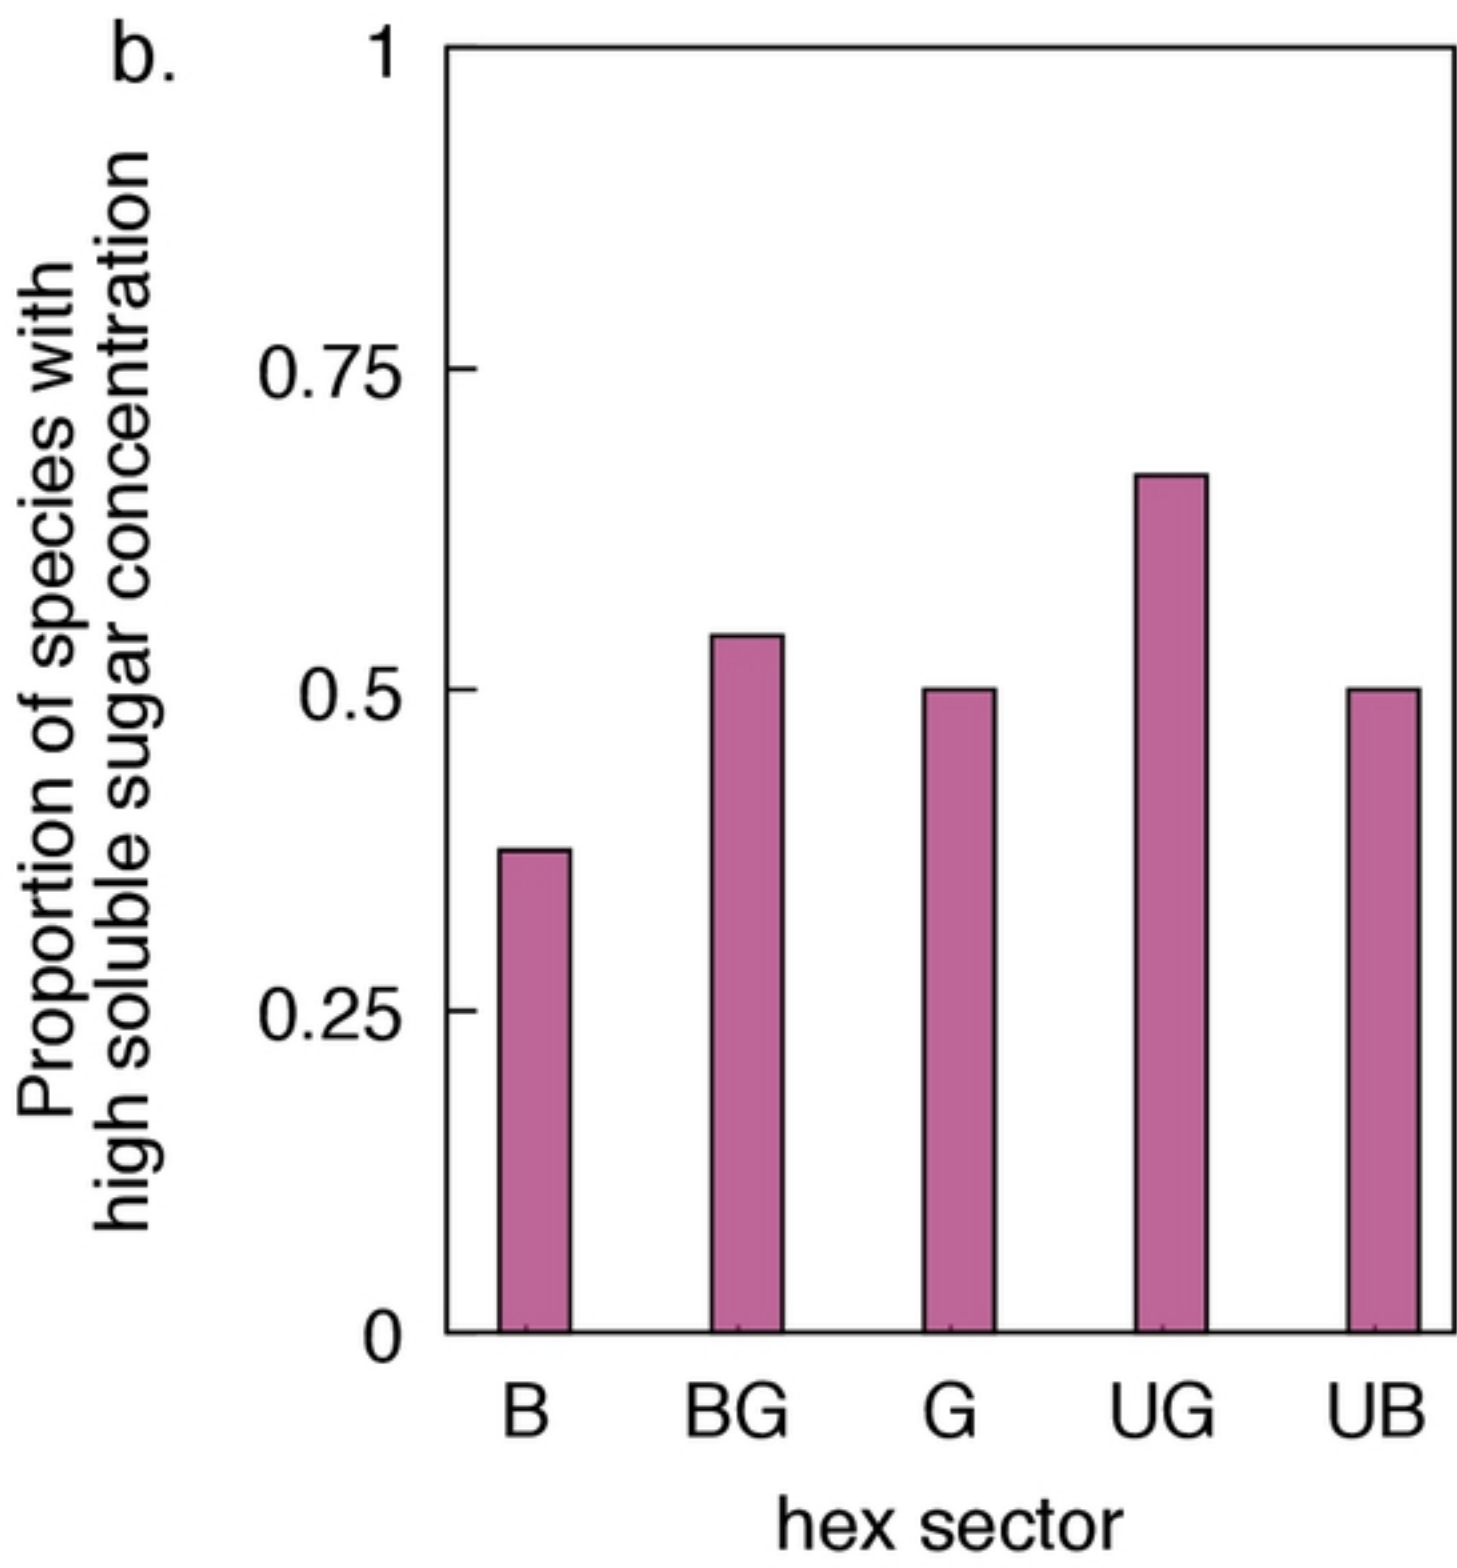

Figure 2
